# Supplementary material
Source: Springer Nature journal article supplement (https://www.springermedizin.de/resource/supplementary/12885_2013_4149_MOESM8_ESM.docx/9465546)
Supplement: MOESM8 [file 9465546]

**Table 1 Genes Included on the Angiogenesis PCR Array and expressed by Caco-2 cells**

The Human Angiogenesis RT² Profiler™ PCR Array was used to screen cDNA from Caco-2 cells exposed for 24 hours to either 1% O2, DMOG (1mM), EGF (10ng/ml) or a combination of EGF plus DMOG. Data were compared to HKG: ActB (-actin), 18S rRNA, HPRT1 (hypoxanthine phosphoribosyltransferase 1) and RPL13A (60S ribosomal protein L13a), and are fold change *versus* untreated cells. Changes ≥2-fold are shown in bold. Data are from a representative array performed in duplicate using cDNA pooled from 3 different replicate experiments.

| **Symbol** | **Gene Name** | **Description** | **Stimulus** | | | |
| --- | --- | --- | --- | --- | --- | --- |
| **Hypoxia** | **DMOG** | **EGF** | **EGF + DMOG** |
| AKT1 | PKB/PRKBA | V-akt murine thymoma viral oncogene homolog 1 | -1.1 | 1.3 | 1.2 | 1.1 |
| ANGPT1 | AGP1/AGPT | Angiopoietin 1 | **2.3** | **2.1** | 1.6 | **2.3** |
| ANGPTL3 | ANGPT5 | Angiopoietin-like 3 | **2.1** | **2.4** | 1.3 | **2.4** |
| ANGPTL4 | ANGPTL2/  ARP4 | Angiopoietin-like 4 | **3.1** | **3.9** | 1.4 | **5.8** |
| ANPEP | CD13/LAP1 | Alanyl (membrane) aminopeptidase (aminopeptidase N, aminopeptidase M, microsomal aminopeptidase, CD13, p150) | 1.5 | 1.3 | -1.4 | 1.4 |
| CCL11 | SCYA11 | Chemokine (C-C motif) ligand 11 | 1.9 | 1.1 | 1.5 | **3.5** |
| CCL2 | GDCF-2/  GDCF-2 HC11 | Chemokine (C-C motif) ligand 2 | 1.4 | -1.5 | 1.6 | 1.4 |
| COL18A1 | KNO | Collagen, type XVIII, alpha 1 | 1.8 | 1.2 | 1.0 | 1.3 |
| COL4A3 | TUMSTATIN | Collagen, type IV, alpha 3 (Goodpasture antigen) | 1.7 | -1.1 | 1.3 | **2.2** |
| EDG1 | CHEDG1/  D1S3362 | Endothelial differentiation, sphingolipid G-protein-coupled receptor 1, SIPR1 | 1.7 | 1.5 | 1.7 | **3.0** |
| EFNA1 | B61/ECKLG | Ephrin-A1 | **2.6** | **2.4** | 1.0 | **2.0** |
| EFNA3 | EFL2/EPLG3 | Ephrin-A3 | **7.2** | **6.6** | 1.3 | **4.9** |
| EFNB2 | EPLG5/HTKL | Ephrin-B2 | 1.4 | 1.3 | 1.3 | 1.6 |
| ENG | CD105/END | Endoglin | 1.1 | 1.1 | 1.5 | 1.2 |
| EPHB4 | HTK/MYK1 | EPH receptor B4 | 1.2 | 1.0 | 1.5 | 1.3 |
| EREG | ER | Epiregulin | 1.2 | 1.1 | 1.2 | -1.9 |
| FGFR3 | ACH/CEK2 | Fibroblast growth factor receptor 3 | 1.4 | 1.5 | 1.2 | 1.4 |
| FLT1 | FLT/VEGFR1 | Fms-related tyrosine kinase 1 | **3.1** | **2.8** | 1.4 | **2.6** |
| HIF1A | HIF-1alpha | Hypoxia-inducible factor 1, alpha | -1.5 | 1.0 | 1.0 | 1.0 |
| HPSE | HPA/HPR1 | Heparanase | 1.7 | 1.9 | 1.1 | 1.8 |

*Continued……..*

| ID1 | ID | Inhibitor of DNA binding 1, dominant negative helix-loop-helix protein | -1.3 | 1.6 | 1.7 | 1.9 |
| --- | --- | --- | --- | --- | --- | --- |
| ID3 | HEIR-1 | Inhibitor of DNA binding 3, dominant negative helix-loop-helix protein | 1.5 | -1.0 | 1.4 | **2.5** |
| IGF1 | IGFI | Insulin-like growth factor 1 | 1.9 | 1.4 | 1.2 | 1.6 |
| IL6 | BSF2/HGF | Interleukin 6 (interferon, beta 2) | 1.9 | 1.3 | 1.5 | 1.7 |
| IL-8 | 3-10C/AMCF-I | Interleukin 8 | 1.9 | -1.1 | 1.2 | **2.4** |
| ITGAV | CD51/MSK8 | Integrin, alpha V (CD51) | -1.1 | 1.4 | 1.9 | 1.9 |
| ITGB3 | CD61/GP3A | Integrin, beta 3 (platelet glycoprotein IIIa, antigen CD61) | 1.3 | -1.1 | -1.2 | **2.4** |
| JAG1 | AGS/AHD | Jagged 1 (Alagille syndrome) | 1.1 | 1.6 | 1.6 | **2.7** |
| KDR | FLK1/VEGFR | Kinase insert domain receptor | 1.7 | -1.2 | -1.2 | **2.3** |
| LAMA5 | KIAA1907 | Laminin, alpha 5 | 1.6 | 1.2 | 1.0 | 1.0 |
| MMP2 | CLG4/CLG4A | Matrix metallopeptidase 2 (gelatinase A, 72kDa gelatinase, 72kDa type IV collagenase) | 1.7 | 1.5 | -1.3 | 1.6 |
| MMP9 | CLG4B/GELB | Matrix metallopeptidase 9 (gelatinase B, 92kDa gelatinase, 92kDa type IV collagenase) | **2.6** | **2.6** | 1.7 | **2.4** |
| NOTCH4 | INT3/  NOTCH3 | Notch homolog 4 (Drosophila) | 1.5 | -1.3 | 1.0 | **2.0** |
| NRP1 | DKFZp686A03134/DKFZp781F1414 | Neuropilin 1 | -1.6 | -1.3 | -1.5 | -1.1 |
| NRP2 | NP2/NPN2 | Neuropilin 2 | -1.0 | 1.0 | 1.1 | 1.5 |
| PDGFA | PDGF-A/  PDGF1 | Platelet-derived growth factor alpha polypeptide | 1.2 | 1.5 | 1.2 | -1.2 |
| PECAM1 | CD31/  PECAM-1 | Platelet/endothelial cell adhesion molecule (CD31 antigen) | 1.61 | -1.3 | 1.0 | 1.7 |
| PLAU | ATF/UPA | Plasminogen activator, urokinase | 1.4 | 1.4 | 1.4 | 1.7 |
| PLXDC1 | TEM3/TEM7 | Plexin domain containing 1 | 1.9 | 1.0 | 1.7 | 1.8 |
| SERPINF1 | EPC-1/PEDF | Serpin peptidase inhibitor, clade F (pigment epithelium derived factor) | 1.5 | 1.1 | 1.2 | 1.5 |
| SPHK1 | SPHK | Sphingosine kinase 1 | 1.5 | 1.0 | 1.6 | **2.0** |
| TGFA | TFGA | Transforming growth factor, alpha | 1.9 | 1.4 | 1.5 | **2.3** |
| TGFB1 | CED/DPD1 | Transforming growth factor, beta 1 | **5.4** | **4.3** | 1.4 | **4.6** |
| TGFB2 | TGF-beta2 | Transforming growth factor, beta 2 | 1.7 | 1.0 | 1.0 | 1.8 |
| TGFBR1 | ACVRLK4/  ALK-5 | Transforming growth factor, beta receptor I (activin A receptor type II-like kinase, 53kDa) | 1.6 | 1.5 | 1.3 | 1.6 |
| THBS1 | THBS/TSP | Thrombospondin 1 | 1.3 | 1.2 | 1.0 | 1.0 |
| THBS2 | TSP2 | Thrombospondin 2 | 1.1 | 1.0 | -1.2 | -1.1 |
| TIMP1 | CLGI/EPA | TIMP metallopeptidase inhibitor 1 | 1.3 | -1.2 | -1.1 | 1.1 |
| TIMP2 | CSC-21K | TIMP metallopeptidase inhibitor 2 | 1.5 | -1.2 | -1.3 | -1.1 |
| TNFAIP2 | B94 | Tumour necrosis factor, alpha-induced protein 2 | 1.7 | 1.2 | -1.1 | 1.4 |
| VEGF | VEGFA/VPF | Vascular endothelial growth factor | **3.1** | **3.4** | 1.0 | **3.1** |
